# Supplementary material
Source: PubMed Central journal article supplement (PMC5809696)
Supplement: JB.00538-17_zjb005184648s1.pdf [file JB.00538-17_zjb005184648s1.pdf]

Table S1: Concentration of elements in AWF.

| <b>Element</b> | <b>Conc. (ppm)<sup>a</sup></b> | <b>Std Dev. (ppm)</b> | <b>Conc. (M)<sup>b</sup></b> | <b>Std Dev. (M)</b> |
|----------------|--------------------------------|-----------------------|------------------------------|---------------------|
| <b>Ca</b>      | 389.1                          | 44.9                  | 9.7 mM                       | 1.1 mM              |
| <b>K</b>       | 1250.7                         | 210.5                 | 32 mM                        | 5.4 mM              |
| <b>Mg</b>      | 107.8                          | 7.5                   | 4.4 mM                       | 0.3 mM              |
| <b>Na</b>      | 25.7                           | 6.1                   | 1.1 mM                       | 0.3 mM              |
| <b>P</b>       | 36.9                           | 10.4                  | 1.2 mM                       | 0.3 mM              |
| <b>S</b>       | 247.3                          | 82.8                  | 7.7 mM                       | 2.6 mM              |
| <b>B</b>       | 2.8                            | 0.9                   | 258.5 $\mu$ M                | 80.4 $\mu$ M        |
| <b>Fe</b>      | 0.12                           | 0.02                  | 2.16 $\mu$ M                 | 0.4 $\mu$ M         |
| <b>Mn</b>      | 2.6                            | 0.2                   | 47.5 $\mu$ M                 | 3.1 $\mu$ M         |
| <b>Zn</b>      | 0.44                           | 0.03                  | 6.7 $\mu$ M                  | 0.5 $\mu$ M         |
| <b>Cd</b>      | 0.008                          | 0.001                 | 66.7 nM                      | 12.4 nM             |

a. Concentration of element given in parts per million

b. Concentration of element given in molarity

Table S2: Primers used in this study.

| Primer    | Sequence (5'-3')                                | Description                                                                                |
|-----------|-------------------------------------------------|--------------------------------------------------------------------------------------------|
| oSWC01445 | ATGCTTCCGGCTCGTATGTTGT<br>GT                    | Forward M13 primer                                                                         |
| oSWC01446 | GGCGATTAAGTTGGGTAACGC<br>CAG                    | Reverse M13 primer                                                                         |
| oSWC01662 | TCGTTGATCGCGGTCGCCACC                           | Downstream forward <i>cvsS</i> KO                                                          |
| oSWC01663 | CACATGGAATTCTTTCCGAGC<br>GTTGCGCCTGC            | Downstream forward nested <i>cvsS</i><br>KO with EcoRI site                                |
| oSWC01664 | ATTGACCTGCCGGAACGTACC                           | Downstream reverse <i>cvsS</i> KO                                                          |
| oSWC01665 | GGTACGTTCCGGCAGGTCAAT<br>CAACCGCCTTTGTATGGACTTC | Upstream forward <i>cvsS</i> KO with<br>overlap                                            |
| oSWC01666 | TGATGCGCAGGATATTGAGTG<br>G                      | Upstream reverse <i>cvsS</i> KO                                                            |
| oSWC01667 | CACATGGGATCCAGCGTCTCT<br>GTGCCATCCTTGG          | Upstream nested reverse <i>cvsS</i> KO<br>with BamHI site                                  |
| oSWC01668 | TCGTCGTC AATCAACAGGC                            | Downstream forward <i>cvsR</i> KO                                                          |
| oSWC01669 | CACATGGAATTCAAACGCACC<br>TCGCTATCGGC            | Downstream forward nested <i>cvsR</i><br>KO with EocRI site                                |
| oSWC01670 | TATCTTTACGGTGGAGCCGGG<br>G                      | Downstream reverse <i>cvsR</i> KO                                                          |
| oSWC01671 | CGGCTCCACCGTAAAGATATT<br>CAACCAGTAACAGGCGCATC   | Upstream forward <i>cvsR</i> KO with<br>overlap                                            |
| oSWC01672 | TGTCTGTCAGTGCCACCAG                             | Upstream reverse <i>cvsR</i> KO                                                            |
| oSWC01673 | CACATGGGATCCTTCGCTTAG<br>GCAGGGAAGG             | Upstream nested reverse <i>cvsR</i> KO<br>with BamHI site                                  |
| oSWC01700 | TTGGGCACAGGTTTCGGTCTTG                          | Downstream forward PCR screen<br><i>cvsS</i> KO                                            |
| oSWC01701 | AAGCACCAGTCCTGATGGC                             | Downstream reverse PCR screen<br><i>cvsS</i> KO                                            |
| oSWC01702 | TTGAGTCCGGCAGACTCCAGC                           | Upstream forward PCR screen<br><i>cvsS</i> KO                                              |
| oSWC01703 | TAAGGGTCTGGCGACACCG                             | Upstream reverse PCR screen<br><i>cvsS</i> KO                                              |
| oSWC01704 | AGCAAGTGGTTGATCTGGG                             | Downstream forward PCR screen<br><i>cvsR</i> KO and used in RT-PCR for<br><i>cvsR-cvsS</i> |
| oSWC01705 | ATCACGGTGCGCAGGGCGCTT<br>C                      | Downstream reverse PCR screen<br><i>cvsR</i> KO                                            |
| oSWC01706 | TGATTCCTGTAGACCTGGC                             | Upstream forward PCR screen<br><i>cvsR</i> KO                                              |
| oSWC01707 | ATGCCAAAGCACTGAGCAAG                            | Upstream reverse PCR screen<br><i>cvsR</i> KO                                              |

|           |                                              |                                                                              |
|-----------|----------------------------------------------|------------------------------------------------------------------------------|
| oMRF0150  | GCCTTGCGGGGTCAACAA                           | Reverse for RT-PCR for PSPTO_3383-PSPTO_3382                                 |
| oSWC05046 | GACAAGCGTCTCTGTGCCATCCT                      | Forward primer for RT-PCR for PSPTO_3382- <i>cvsR</i>                        |
| oMRF0145  | GGCCAGGTCTACAGGAATCATC                       | Forward primer for RT-PCR for PSPTO_3383-PSPTO_3382                          |
| oMRF0148  | GGTGTCGCCAGACCCTTACC                         | Reverse primer for RT-PCR for PSPTO_3382- <i>cvsR</i>                        |
| oMRF0535  | GGCGTGCGGTGATCGAG                            | Reverse primer for RT-PCR for <i>cvsR-cvsS</i>                               |
| oMRF0010  | CACCGTTTTTCATTGTTAGGAGGGTCCATAG              | reverse promoter fusion without PSPTO_3383 gene, begins at end of PSPTO_3383 |
| oMRF0011  | TGTCGTAATGCTGTGTCTGTCA GTG                   | forward promoter fusion 400bp upstream of PSPTO_3383                         |
| oMRF0016  | GCGGCTTAACTCAAGCGTTAG A                      | forward primer for pBS59                                                     |
| oMRF0017  | TCCTGAGGTAGCCATTCATCC A                      | reverse primer for pBS59                                                     |
| oMRF0050  | TCACTTGTCATCGTCGTCCTTG TAGTCACCCCCGGCTCCACCG | C-terminal FLAG-tag gateway overexpression C-terminus of <i>cvsR</i>         |
| oMRF0051  | CACCATGCGCCTGTTACTGGTT GAAG                  | C-terminal FLAG-tag gateway overexpression N-terminus of <i>cvsR</i>         |
| oMRF0233  | CAAGCGTCTCTGTGCCATC                          | <i>algD</i> qPCR sense                                                       |
| oMRF0234  | CGAGCGGAAGAATGACACC                          | <i>algD</i> qPCR antisense                                                   |
| oSWC02061 | TTTCTGCAGCAACCGCCTTTGT ATGG                  | <i>cvsR</i> complement forward primer                                        |
| oSWC02063 | TTTAAGCTTTTGGCATGTTTTT GATGG                 | <i>cvsR</i> complement reverse primer                                        |
| oMRF0355  | CGGCGGCCGCCGCCTTTGTAT GGACTTCAACC            | Reverse primer for <i>cvsR</i> insertion into pET21 with NotI site           |
| oMRF0357  | CGGGATCCATGCGCCTGTTAC TGGTTGAA               | Forward primer for <i>cvsR</i> insertion into pET21 with BamHI site          |
| oMRF0375  | CTGTAAGCGCTTGTTTCGCATT                       | <i>hrpR</i> peak #2 ChIP-seq peak 5'-FAM tag for EMSA and DNase footprinting |
| oMRF0376  | AGAAACGCGCTATTCATTGCA                        | <i>hrpR</i> peak #2 ChIP-seq peak 3' for EMSA and DNase footprinting         |
| oMRF0377  | TGCGGAGTAAATCGCAGGC                          | <i>spf</i> ChIP-seq peak 5'-FAM tag for EMSA and DNase footprinting          |
| oMRF0378  | GCAGTGCCGCTGCTGGT                            | <i>spf</i> ChIP-seq peak 3' for EMSA and DNase footprinting                  |

|           |                                            |                                                                              |
|-----------|--------------------------------------------|------------------------------------------------------------------------------|
| oMRF0381  | TGCAGGCGTCGAGTCTAACA                       | PSPTO_3383 ChIP-seq peak 5'-FAM tag for EMSA and DNase footprinting          |
| oMRF0382  | TGCGGATCGATGCCACG                          | PSPTO_3383 ChIP-seq peak 3' for EMSA and DNase footprinting                  |
| oMRF0385  | GCAAGTGTCAATATTGAGTTGACTCAAC               | PSPTO_0203 ChIP-seq peak 5' for EMSA and DNase footprinting                  |
| oMRF0386  | CCTTGATGCTTCCACCAGGA                       | PSPTO_0203 ChIP-seq peak 3' with 5'FAM for EMSA and DNase footprinting       |
| oMRF0387  | TGGCCGTTATTTAACGCATTG                      | <i>katB</i> ChIP-seq peak 5'-FAM for EMSA and DNase footprinting             |
| oMRF0388  | GCGCGACGTTAAGAGTGCA                        | <i>katB</i> ChIP-seq peak 3' for EMSA and DNase footprinting                 |
| oMRF0389  | CCTTACGCAGCCCGTGAG                         | tRNA-cys-1 ChIP-seq peak 5'-FAM for EMSA and DNase footprinting              |
| oMRF0390  | GCCGAGGTCGGAATCGAA                         | tRNA-cys-1 ChIP-seq peak 3' for EMSA and DNase footprinting                  |
| oMRF0391  | GGCATCGACCTTGTCAGATCC                      | PSPTO_4969 ChIP-seq peak 5' for EMSA and DNase footprinting                  |
| oMRF0392  | TATGGTTTCCCGGTCAAGGACACGAAAATCTTCATCGAGTGA | PSPTO_4969 ChIP-seq peak 3' w/ 5'FAM tag for EMSA and DNase footprinting     |
| oMRF0393  | AGCTGTGGAAACTCGCGAA                        | <i>gidA</i> ChIP-seq peak 5' for EMSA and DNase footprinting                 |
| oMRF0394  | CGGACTTGATCGCTGGCTT                        | <i>gidA</i> ChIP-seq peak 3' with 5' FAM tag for EMSA and DNase footprinting |
| oMRF0395  | TCATCCGTTAAATCCCATCTG                      | <i>oprF</i> ChIP-seq peak 5'-FAM for EMSA and DNase footprinting             |
| oMRF0396  | GCGCTAGCGCTCAAGGGA                         | <i>oprF</i> ChIP-seq peak 3' for EMSA and DNase footprinting                 |
| oKMD0123  | TGTCACTCTTGTAACGAACTTG                     | PSPTO_5255 3' FAM-tag for EMSA and DNase footprinting                        |
| oMRF0062  | GCCATCACCTAGAATGT                          | PSPTO_5255 5' for EMSA and DNase footprinting                                |
| oKMD0137  | CGAACAACACAGAGGCTTGGA                      | <i>hrpR</i> peak #1 3' FAM-tag for EMSA and DNase footprinting               |
| oSWC06572 | TAC                                        | <i>hrpR</i> peak #1 5' for EMSA and DNase footprinting                       |
| oMRF0191  | CGCTCAAAGTACCAATC                          | <i>fliC</i> qPCR sense                                                       |

|           |                              |                                |
|-----------|------------------------------|--------------------------------|
| oMRF0192  | GCTCAAAGTCAGAGAGA            | <i>fliC</i> qPCR antisense     |
| oMRF0231  | GGATAACAAGGCGTAAA            | <i>hopAH2-1</i> qPCR sense     |
| oMRF0232  | GCCTGATTCAACTTGTC            | <i>hopAH2-1</i> qPCR antisense |
| oSWC06118 | GTGCCAACGGACAGGCACA          | <i>rsmZ</i> qPCR sense         |
| oSWC06119 | CCCTTGTCATCGTCCTGATGAA       | <i>rsmZ</i> qPCR antisense     |
| oSWC06338 | GCAGGAAGCGCAACAAGACA<br>T    | <i>rsmY</i> qPCR sense         |
| oSWC06339 | GCTTTCCAGACTGTTTCCCTGA<br>T  | <i>rsmY</i> qPCR antisense     |
| oSWC06348 | GGTGAACAAGGAGTTCACCAG<br>GA  | <i>rsmX-3</i> qPCR sense       |
| oSWC06349 | CCAAGACCATTCCAACCTCCCT<br>GT | <i>rsmX-3</i> qPCR antisense   |

Table S3: Strains and plasmids used in this study.

| Strain Name                                                  | Genotype                                                                                                                                                                                              | Reference               |
|--------------------------------------------------------------|-------------------------------------------------------------------------------------------------------------------------------------------------------------------------------------------------------|-------------------------|
| <i>Pseudomonas syringae</i> pv. <i>tomato</i> DC3000 strains |                                                                                                                                                                                                       |                         |
| <i>Pto</i> (WT)                                              | <i>Pseudomonas syringae</i> pv. <i>tomato</i> DC3000 wild type, Rif <sup>R</sup>                                                                                                                      | (1)                     |
| BBPS33                                                       | <i>Pto</i> $\Delta$ <i>cvsS</i>                                                                                                                                                                       | (2)                     |
| BBPS34                                                       | <i>Pto</i> $\Delta$ <i>cvsR</i>                                                                                                                                                                       | (2)                     |
| BBPS35                                                       | BBPS34 <i>attTn7::Tn7-PSPTO_3383-cvsR</i>                                                                                                                                                             | (2)                     |
| MFPS03                                                       | <i>Pto</i> pBS59:: <i>P<sub>cvsSR</sub></i>                                                                                                                                                           | This study              |
| MFPS04                                                       | <i>Pto</i> $\Delta$ <i>cvsS</i> pBS59:: <i>P<sub>cvsSR</sub></i>                                                                                                                                      | This study              |
| MFPS04                                                       | <i>Pto</i> $\Delta$ <i>cvsR</i> pBS59:: <i>P<sub>cvsSR</sub></i>                                                                                                                                      | This study              |
| BMS2                                                         | <i>Pto</i> pBS44                                                                                                                                                                                      | (3)                     |
| PS392                                                        | <i>Pto</i> $\Delta$ <i>algD</i>                                                                                                                                                                       | (4)                     |
| MFPS10                                                       | <i>Pto</i> $\Delta$ <i>algD</i> $\Delta$ <i>cvsS</i>                                                                                                                                                  | This study              |
| MFPS11                                                       | <i>Pto</i> $\Delta$ <i>algD</i> $\Delta$ <i>cvsR</i>                                                                                                                                                  | This Study              |
| CUCPB5113                                                    | <i>Pto</i> $\Delta$ <i>hrcQb-U</i> , Sp <sup>R</sup>                                                                                                                                                  | (5)                     |
| MFPS05                                                       | <i>Pto</i> $\Delta$ <i>hrcQb-U</i> $\Delta$ <i>cvsS</i> , Sp <sup>R</sup>                                                                                                                             | This study              |
| MFPS06                                                       | <i>Pto</i> $\Delta$ <i>hrcQb-U</i> $\Delta$ <i>cvsS</i> , Sp <sup>R</sup>                                                                                                                             | This study              |
| MFPS09                                                       | <i>Pto</i> $\Delta$ <i>cvsR</i> pBS46:: <i>cvsR-FLAG</i>                                                                                                                                              | This study              |
| MFPS20                                                       | <i>Pto</i> pBS58:: <i>P<sub>hrpRS</sub></i>                                                                                                                                                           | This study              |
| MFPS21                                                       | <i>Pto</i> $\Delta$ <i>cvsS</i> pBS58:: <i>P<sub>hrpRS</sub></i>                                                                                                                                      | This study              |
| MFPS22                                                       | <i>Pto</i> $\Delta$ <i>cvsR</i> pBS58:: <i>P<sub>hrpRS</sub></i>                                                                                                                                      | This study              |
| MFPS24                                                       | <i>Pto</i> pBS63                                                                                                                                                                                      | This study              |
| MFPS25                                                       | <i>Pto</i> $\Delta$ <i>cvsS</i> pBS63                                                                                                                                                                 | This study              |
| MFPS26                                                       | <i>Pto</i> $\Delta$ <i>cvsR</i> pBS63                                                                                                                                                                 | This study              |
| <i>Escherichia coli</i> strains                              |                                                                                                                                                                                                       |                         |
| DH5 $\alpha$                                                 | <i>huA2 lac(del)U169 phoA glnV44 <math>\Phi</math>80' lacZ(del)M15 gyrA96 recA1 relA1 endA1 thi-1 hsdR17</i>                                                                                          | ThermoFisher Scientific |
| TOP10                                                        | F- <i>mcrA</i> $\Delta$ ( <i>mrr-hsdRMS-mcrBC</i> ) $\Phi$ 80 <i>lacZ</i> $\Delta$ M15 $\Delta$ <i>lacX74 recA1 araD139 <math>\Delta</math>(ara leu) 7697 galU galK</i> rpsL (StrR) <i>endA1 nupG</i> | ThermoFisher Scientific |

| BL21 (DE3)    |                                                                                        | <i>fhuA2 [lon [dcm] Δhs ΔEcoRI-B int::(lacI:: i21 Δnin5</i> |
|---------------|----------------------------------------------------------------------------------------|-------------------------------------------------------------|
| Plasmids      |                                                                                        |                                                             |
| Name          | Description                                                                            | Reference                                                   |
| pK18mobSacB   | pMB1 <i>mob sacB</i> , sucrose <sup>S</sup> , Km <sup>R</sup>                          | (6)                                                         |
| pZB20         | pK18mobSacB with regions flanking PSPTO_3380 cloned into it using the EcoRI-BamHI site | (2)                                                         |
| pZB21         | pK18mobSacB with regions flanking PSPTO_3381 cloned into it using the EcoRI-BamHI site | (2)                                                         |
| pENTR/D/TOPO  | Directional cloning vector for entry to the Gateway System                             | ThermoFisher Scientific                                     |
| pENTR/SD/TOPO | Directional cloning vector with ribosome binding site for entry to the Gateway System  | ThermoFisher Scientific                                     |
| pMRF2         | pENTR/D/TOPO::P <sub><i>cvsSR</i></sub>                                                | This study                                                  |
| pBS58         | luxCDABE destination vector                                                            | (3)                                                         |
| pBS59         | luxCDABE destination vector                                                            | (3)                                                         |
| pMRF11        | pBS59::P <sub><i>cvsSR</i></sub>                                                       | This study                                                  |
| pBS44         | luxCDABE destination vector control without insertion                                  | (3)                                                         |
| pUC18miniTn7  | mini-Tn7 mobilizable transposon with multicloningsite, GmR                             | (7)                                                         |

|        |                                                                                                          |            |
|--------|----------------------------------------------------------------------------------------------------------|------------|
| pNTS2  | mini-Tn7 helper plasmid                                                                                  | (7)        |
| pJZ1   | pUC18miniTn7::PSPTO_3383-cvsR                                                                            | This study |
| pBS46  | <i>nptII</i> destination vector                                                                          | (8)        |
| pMRF14 | pENTR/SD/TOPO::cvsR-FLAG                                                                                 |            |
| pMRF15 | pBS46::cvsR-FLAG                                                                                         | This study |
| pET21  | Bacterial expression vector with T7 lac promoter, N-terminal T7 epitope tag, and C-terminal His tag, ApR | Novagen    |
| pMRF21 | pET21::cvsR                                                                                              | This study |
| pMRF22 | pBS58::P <sub>hrpRS</sub>                                                                                | This Study |
| pBS63  | pBS58::P <sub>hrpL</sub>                                                                                 | (9)        |

- Buell CR, Joardar V, Lindeberg M, Selengut J, Paulsen IT, Gwinn ML, Dodson RJ, Deboy RT, Durkin AS, Kolonay JF, Madupu R, Daugherty S, Brinkac L, Beanan MJ, Haft DH, Nelson WC, Davidsen T, Zafar N, Zhou L, Liu J, Yuan Q, Khouri H, Fedorova N, Tran B, Russell D, Berry K, Utterback T, Van Aken SE, Feldblyum TV, D'Ascenzo M, Deng W-L, Ramos AR, Alfano JR, Cartinhour S, Chatterjee AK, Delaney TP, Lazarowitz SG, Martin GB, Schneider DJ, Tang X, Bender CL, White O, Fraser CM, Collmer A.** 2003. The complete genome sequence of the *Arabidopsis* and tomato pathogen *Pseudomonas syringae* pv. *tomato* DC3000. *Proceedings of the National Academy of Sciences* **100**:10181-10186.
- Butcher BG, Bronstein PA, Myers CR, Stodghill PV, Bolton JJ, Markel EJ, Filiatrault MJ, Swingle B, Gaballa A, Helmann JD, Schneider DJ, Cartinhour SW.** 2011. Characterization of the Fur regulon in *Pseudomonas syringae* pv. *tomato* DC3000. *J Bacteriol* **193**:4598-4611.
- Markel E, Maciak C, Butcher BG, Myers CR, Stodghill P, Bao Z, Cartinhour S, Swingle B.** 2011. An extracytoplasmic function sigma factor-mediated cell surface signaling system in *Pseudomonas syringae* pv. *tomato* DC3000 regulates gene expression in response to heterologous siderophores. *J Bacteriol* **193**:5775-5783.
- Markel E, Stodghill P, Bao Z, Myers CR, Swingle B.** 2016. AlgU Controls Expression of Virulence Genes in *Pseudomonas syringae* pv. *tomato* DC3000. *J Bacteriol* **198**:2330-2344.
- Badel JL, Shimizu R, Oh H-S, Collmer A.** 2006. A *Pseudomonas syringae* pv. *tomato* *avrE1/hopM1* Mutant Is Severely Reduced in Growth and Lesion Formation in Tomato. *Molecular Plant-Microbe Interactions* **19**:99-111.
- Schafer A, Tauch A, Jager W, Kalinowski J, Thierbach G, Puhler A.** 1994. Small mobilizable multi-purpose cloning vectors derived from the *Escherichia coli* plasmids



pK18 and pK19: selection of defined deletions in the chromosome of *Corynebacterium glutamicum*. *Gene* **145**:69-73.

7. **Choi KH, Schweizer HP.** 2006. mini-Tn7 insertion in bacteria with single attTn7 sites: example *Pseudomonas aeruginosa*. *Nat Protoc* **1**:153-161.
8. **Swingle B, Thete D, Moll M, Myers CR, Schneider DJ, Cartinhour S.** 2008. Characterization of the PvdS-regulated promoter motif in *Pseudomonas syringae* pv. *tomato* DC3000 reveals regulon members and insights regarding PvdS function in other pseudomonads. *Molecular Microbiology* **68**:871-889.
9. **McCraw SL, Park DH, Jones R, Bentley MA, Rico A, Ratcliffe RG, Kruger NJ, Collmer A, Preston GM.** 2016. GABA ( $\gamma$ -Aminobutyric Acid) Uptake Via the GABA Permease GabP Represses Virulence Gene Expression in *Pseudomonas syringae* pv. *tomato* DC3000. *Molecular Plant-Microbe Interactions* **29**:938-949.

Figure S1

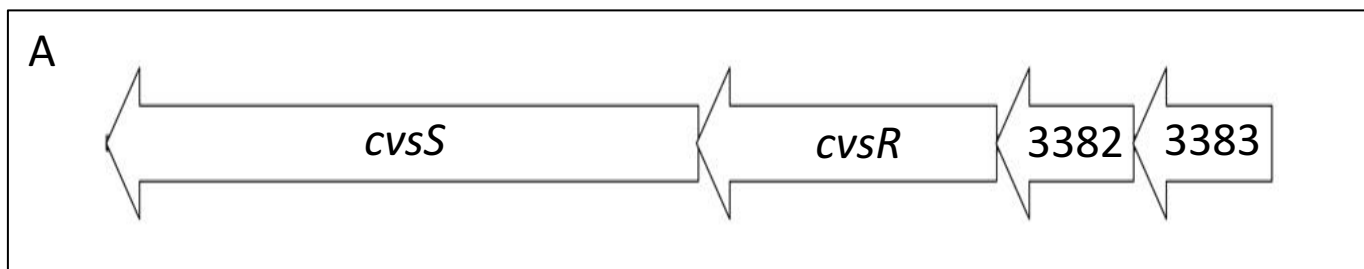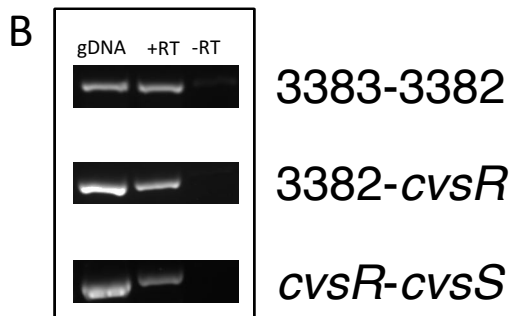

Fig. S1: (A) Genomic arrangement of operon where *cvsS* and *cvsR* are located. (B) Bands produced by PCR of primers overlapping the junction between 3383 and 3382, 3382 and 3381, and 3381 and 3380 using either *Pto* genomic DNA (gDNA), cDNA produced by reverse transcription with random hexamers of RNA (+RT), or a no reverse transcriptase control reaction (-RT). RNA was extracted from *Pto* grown for 18 hours on NB supplemented with  $\text{CaCl}_2$  and sodium succinate.

Figure S2

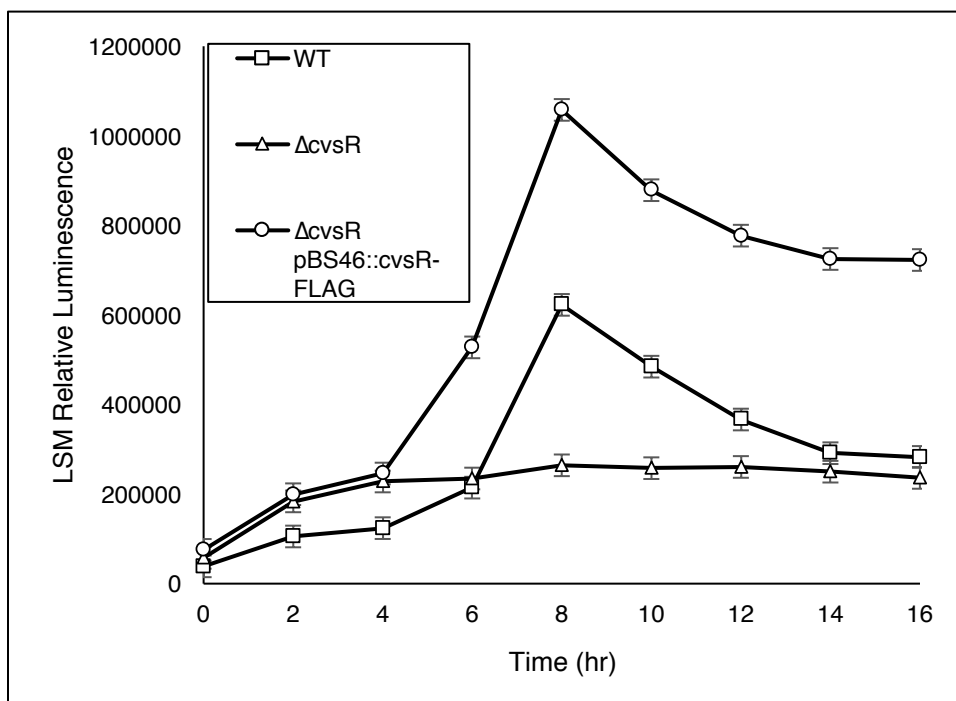

Fig. S2: Luminescence assay to assess transcription of  $P_{cvsSR}$  WT,  $\Delta cvsR$ , and  $\Delta cvsR$  pBS46::cvsR-FLAG when grown in MG supplemented with  $Ca^{2+}$ . The relative luminescence was calculated using the total luminescence relative to the  $OD_{600}$ . This experiment was repeated with independent replicates three times and the three independent experiments were compiled using a least-squares regression. The error bars represent standard error generated by the differences observed between samples.

Figure S3

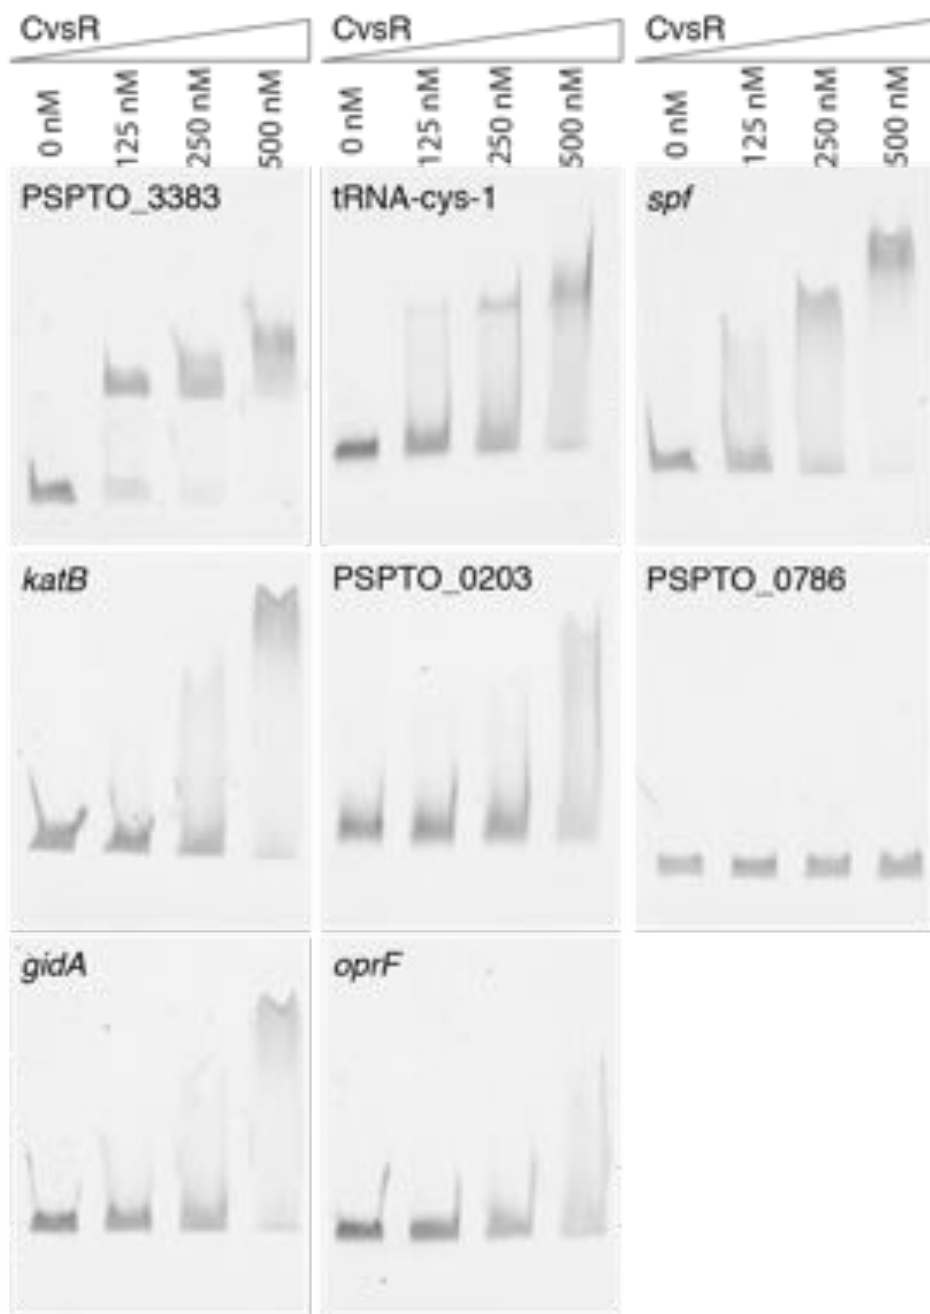

Fig. S3: EMSA with concentrations of CvsR increasing from left to right as written. Probes were chosen based on the location of ChIP-seq peaks, except for PSPTO\_3383 and PSPTO\_0786. No peak was found near either of those areas in the chromosome. CvsR was predicted to bind upstream of PSPTO\_3383 since CvsSR autoregulates. The probe for PSPTO\_0786 is used as a negative control. Probes show a shift with an increased concentration of CvsR due to reduced mobility of the probes upon binding of CvsR. This is not seen for the probe for PSPTO\_0786.

Figure S4

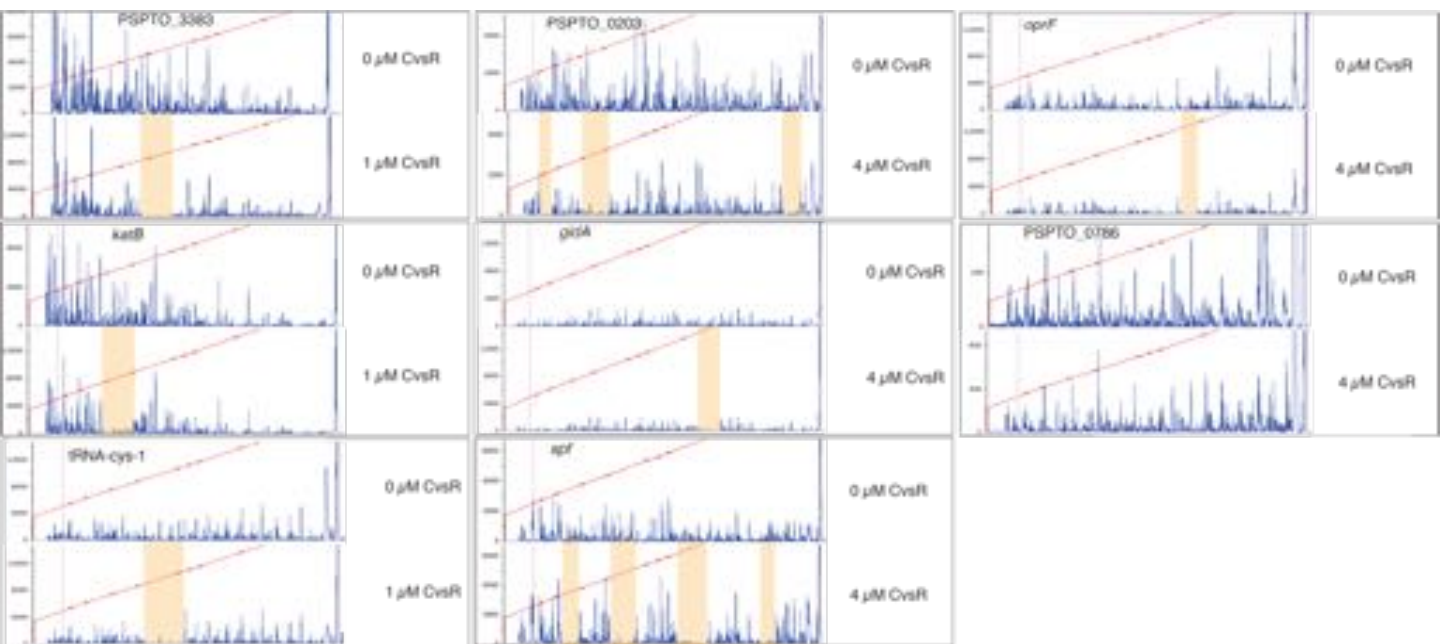

Fig. S4: Fluorescent, non-radioactive DNase footprinting assays showing binding of CvsSR. The red line is a line of best fit that estimates the bp size of each fragment made using a LIZ500 ladder. The blue peaks are fluorescent signal and represent the size of fragmented DNA. The areas that are highlighted in orange are regions with little fluorescence when CvsR is added at 1  $\mu$ M or 4  $\mu$ M to the reaction as compared to when no CvsR is added. These regions signify areas in the probes that were bound by CvsR. A probe for the region PSPTO\_0786 was used as a negative control. There were not any regions that CvsR bound to in this probe.



Figure S6

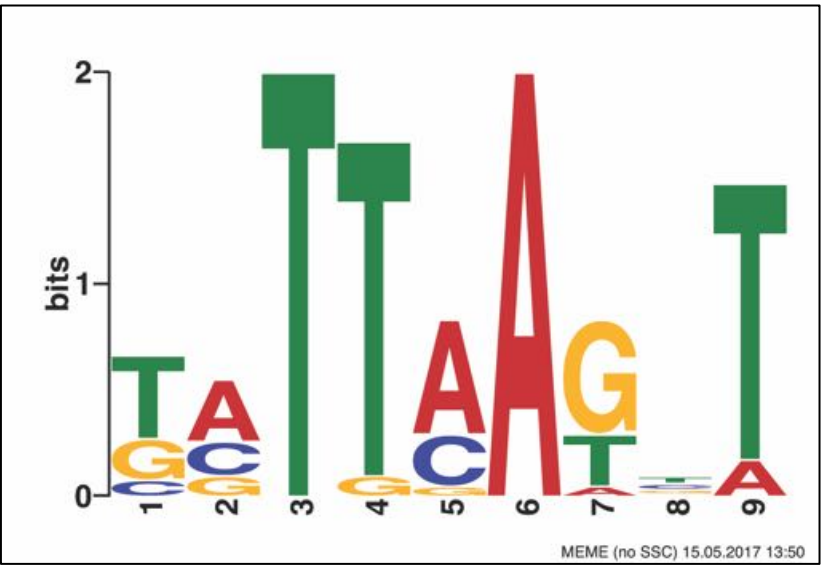

Fig. S6: The predicted binding motif for CvsR discovered using MEME from the compiled Dnase footprinting data.

Figure S7

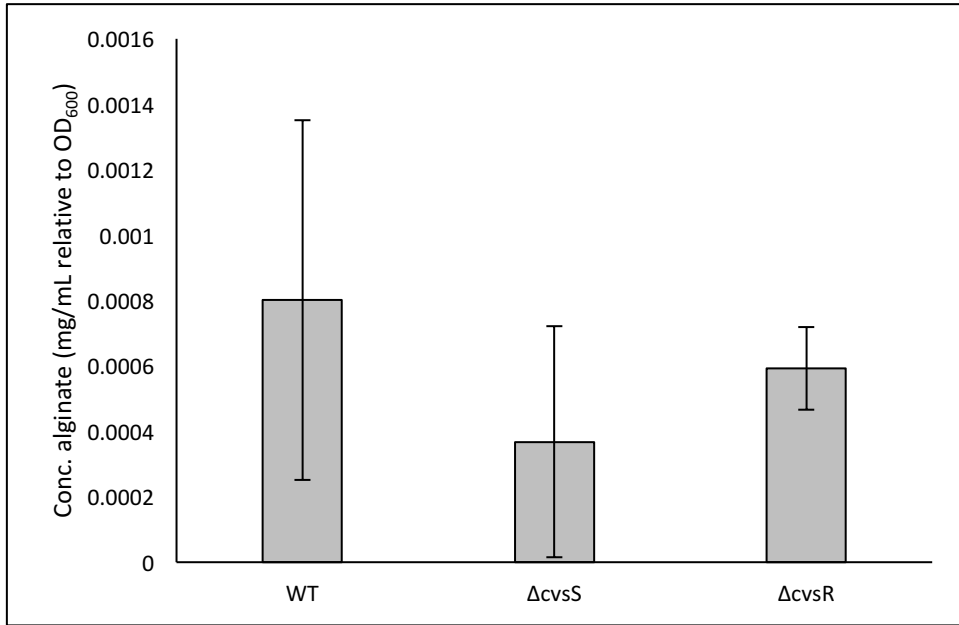

Fig S7: Concentration of alginate produced by WT,  $\Delta cvsS$ , and  $\Delta cvsR$  after one day of growth on NB agar plates. The experiment was repeated using four independent biological replicates. Error bars represent standard deviation between replicates.



Figure S8

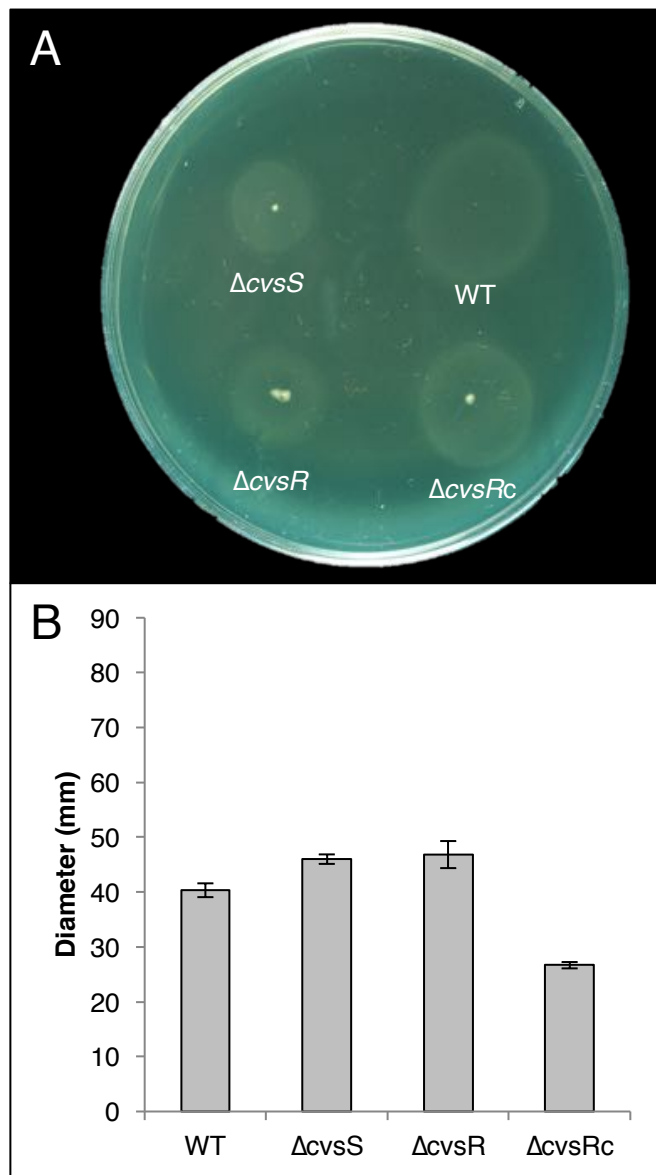

Fig S8: (A) Swarming assays of WT,  $\Delta cvS$ ,  $\Delta cvR$ , and  $\Delta cvRc$  strains grown on NB medium. Pictures of swarming assays taken a day after spotting. (B) Diameters of swarming colonies measured 24 hours after spotting on NB with 5 mM  $CaCl_2$ . The experiment was performed three times with three replicates per experiment. Diameter of colonies was measured across two locations and averaged. Error bars represent standard deviation between replicates.

Figure S9

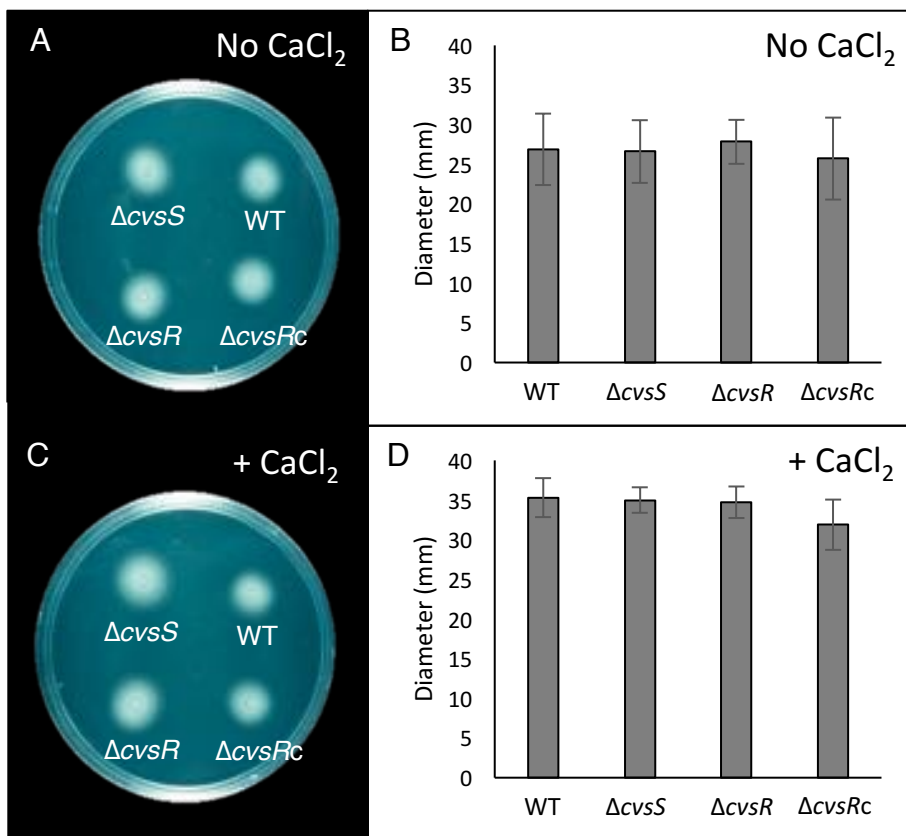

Fig. S9: Swimming assays of WT,  $\Delta cvsS$ ,  $\Delta cvsR$ , and  $\Delta cvsRc$  strains grown on swimming media. (A) Picture of strains taken two days after the start of a swimming assay without  $CaCl_2$ . (B) Diameter of swimming by strains in swimming media taken two days after the start of the assay. (C) Picture of strains taken two days after the start of a swimming assay with  $CaCl_2$ . (D) Diameter of swimming by strains in swimming media with  $CaCl_2$  taken two days after the start of the assay. Pictures of the plates are representative of swimming assays that were performed three times. The diameters are averaged from three biological replicates. The error bars represent standard deviation across from the three biological replicates.

Fig. S10

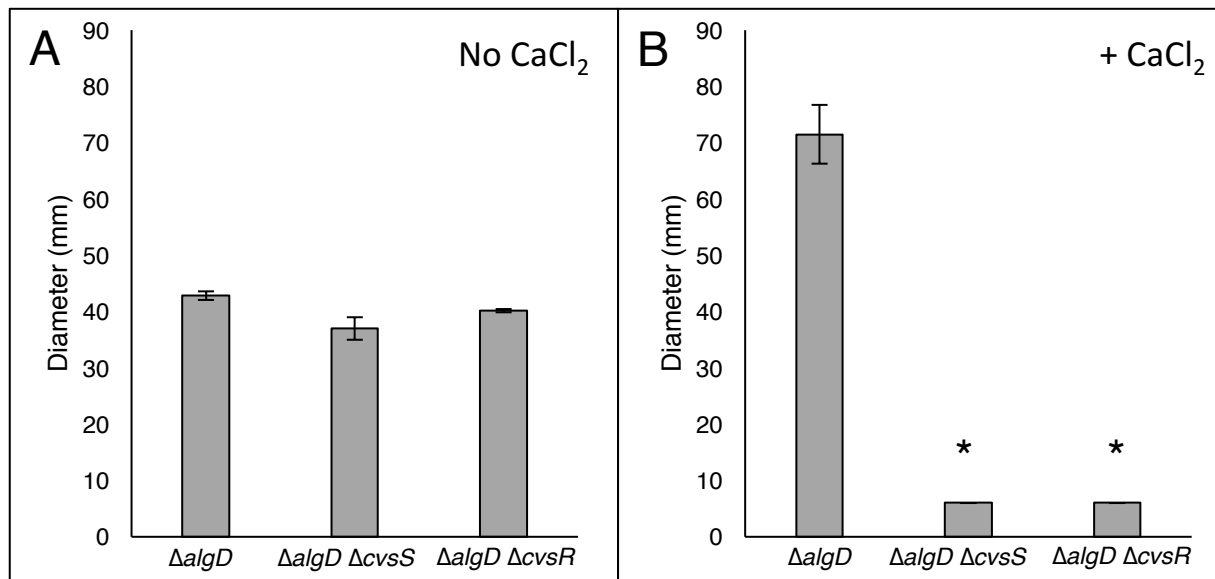

Fig. S10: Diameters of swarming colonies for  $\Delta algD$ ,  $\Delta algD$ ,  $\Delta cvsS$ , and  $\Delta algD \Delta cvsR$  strains measured 24 hours after spotting on (A) NB or (B) NB supplemented with  $CaCl_2$ . Diameter of colonies was measured across two locations and averaged. The experiment was performed three times with three replicates per experiment. The graph is from a single experiment and is representative of trends observed in each experiment. Error bars represent standard deviation between replicates. The \* denote a statistically significant difference with a p-value  $< 0.01$  in swarming diameter between  $\Delta algD$ ,  $\Delta algD$ ,  $\Delta cvsS$ , and  $\Delta algD \Delta cvsR$  strains.

Fig. S11

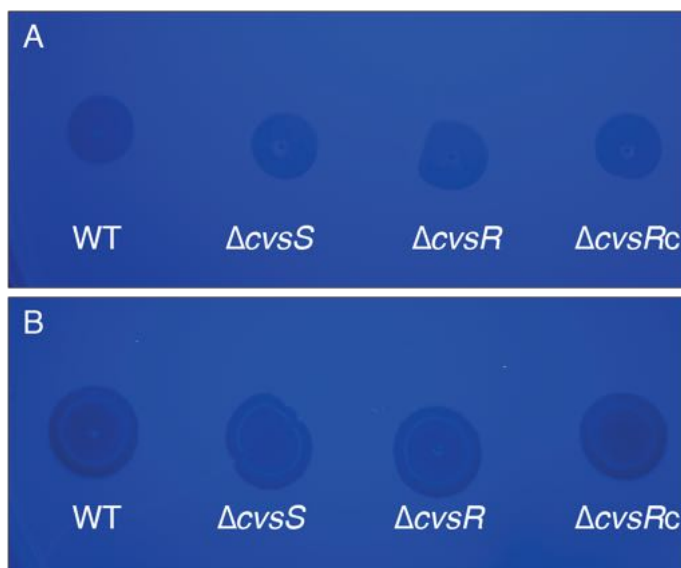

Fig. S11: Growth of WT,  $\Delta cvsS$ ,  $\Delta cvsR$ , and  $\Delta cvsRc$  on NB supplemented with CW after 16 hours (A) and 3 days (B) of growth. Fluorescence of the bacterial strains under ultra-violet light indicated production of cellulose. Bacterial strains were grown to stationary phase in KB media were resuspended at an  $OD_{600}$  of 0.3 in NB media and then five  $\mu$ L of each culture were spotted onto the appropriate media. The plate is representative of assays that were performed three times.

Fig. S12

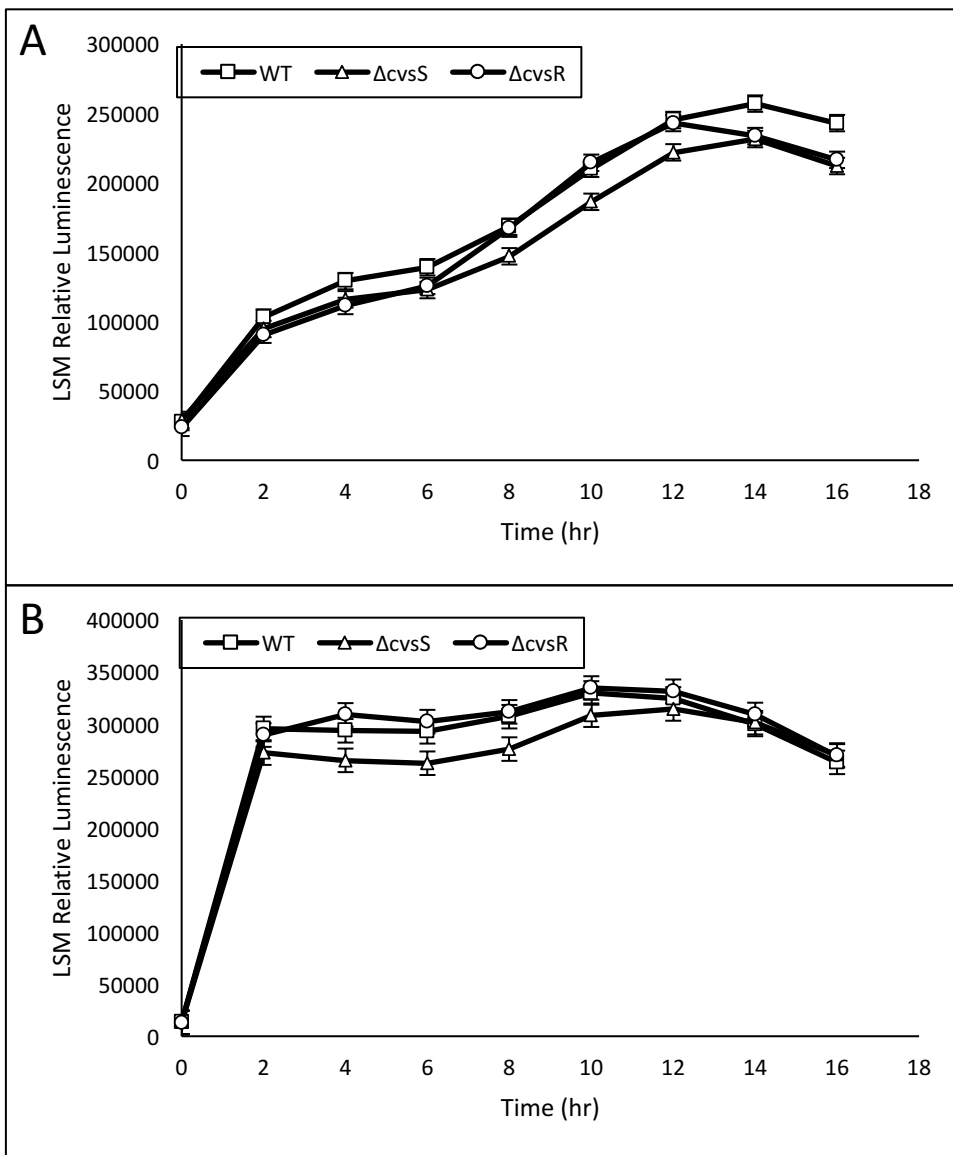

Fig. S12: Luminescence assay to assess transcription of (A)  $P_{hrpRS}$  and (B)  $P_{hrpL}$  in WT, the  $\Delta cvvS$ , and the  $\Delta cvvR$  when grown in MG. The relative luminescence was calculated using the total luminescence relative to  $OD_{600}$ . This experiment was independently replicated three times. The three independent experiments were compiled using a least-squares regression. The error bars represent standard error generated by the differences observed between samples.

Fig. S13

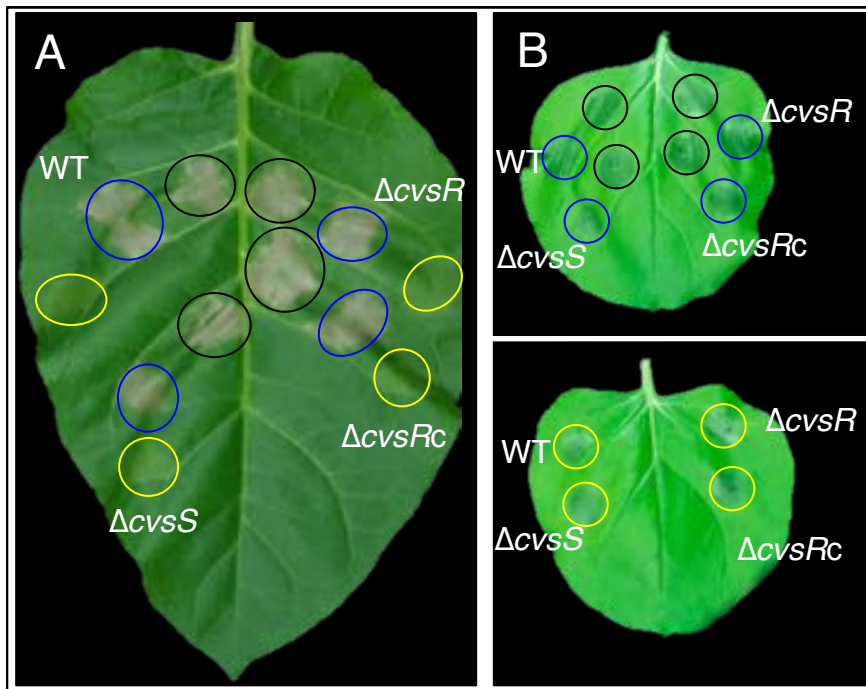

Fig. S13: (A) HR in *N. tabacum* to WT,  $\Delta cv s S$ ,  $\Delta cv s R$ , and  $\Delta cv s R c$  from *Pto* strains at  $2 \times 10^8$  (black),  $2 \times 10^7$  (blue), and  $2 \times 10^6$  (yellow) cfu/mL. (B) HR in *N. benthamiana* with the same *Pto* strains using the same amount of inocula as in *N. tabacum*. Bacterial strains that were inoculated at the same level of inoculum are circled with the same color. The images shown were photographed 2 days after inoculation for *N. tabacum* and 1 day after inoculation for *N. benthamiana*. The experiment was repeated three times.

Figure S14

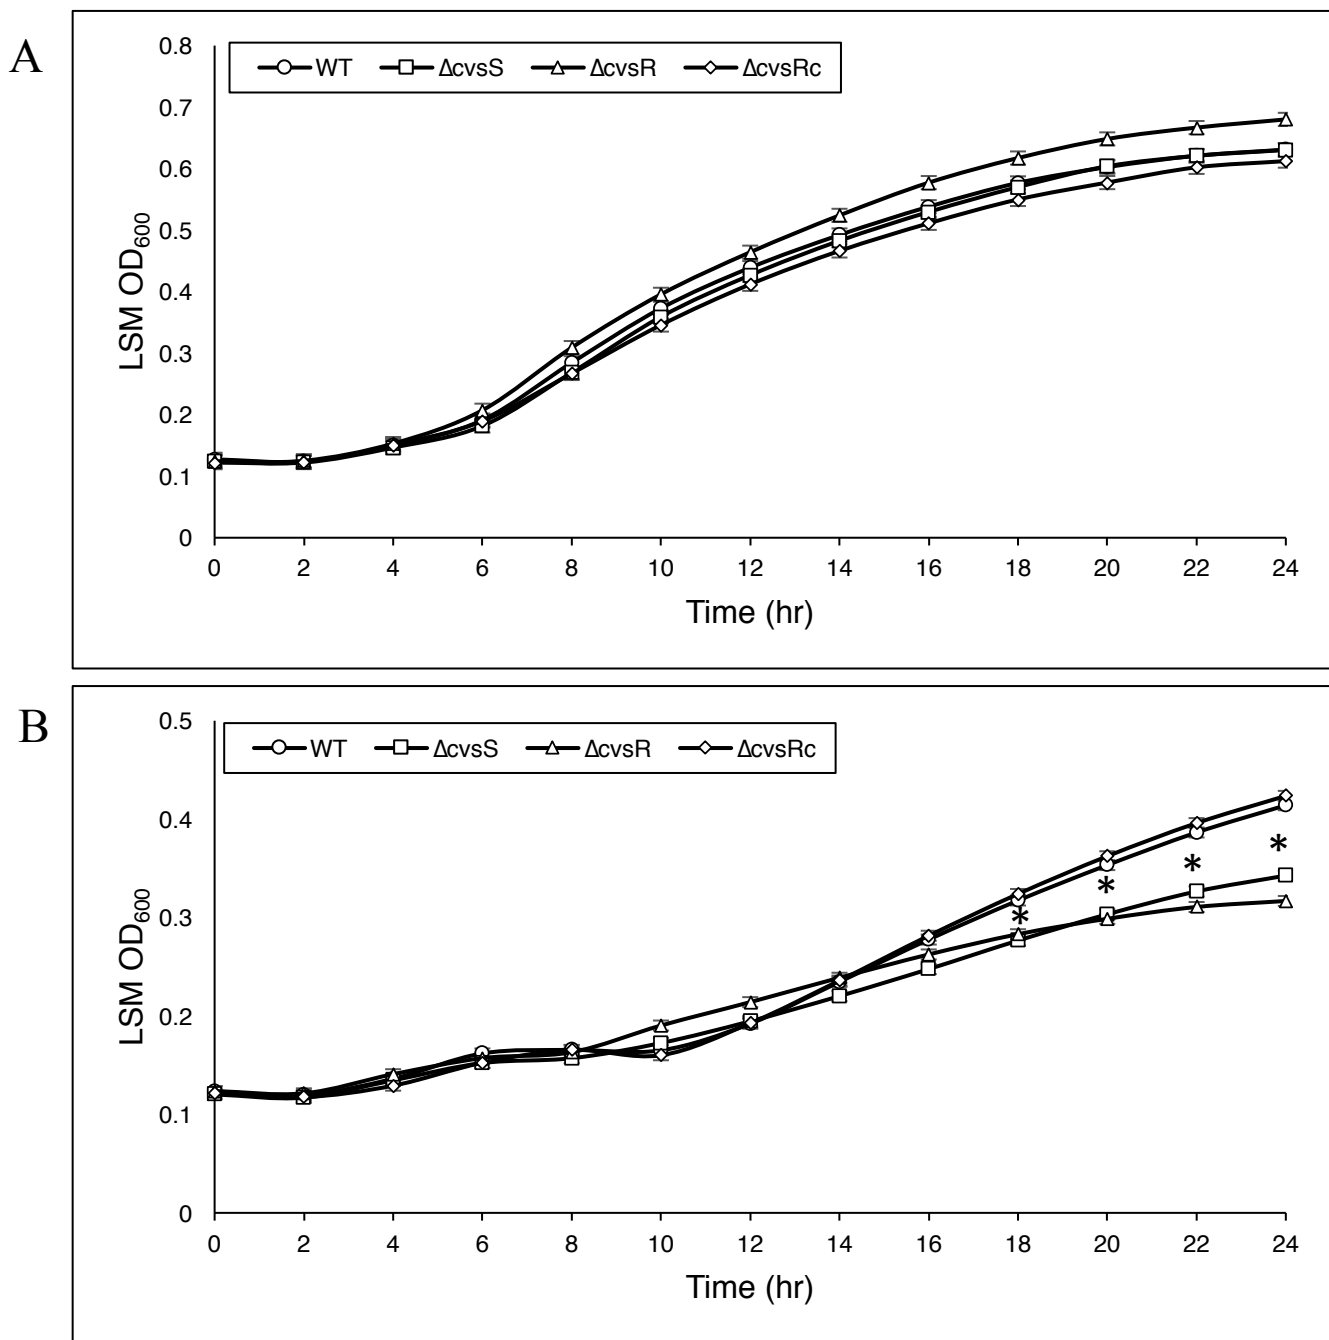

Fig. S14: The least-squares mean of three separate growth curves of WT,  $\Delta cvsS$ ,  $\Delta cvsR$ , and  $\Delta cvsRc$  grown in (A) MG or (B) MG supplemented with  $Ca^{2+}$ . The \* denotes statistically significant differences determined using a Tukey HSD test with a p-value < 0.01 between  $OD_{600}$  of WT,  $\Delta cvsS$ , and  $\Delta cvsR$ .

Figure S15

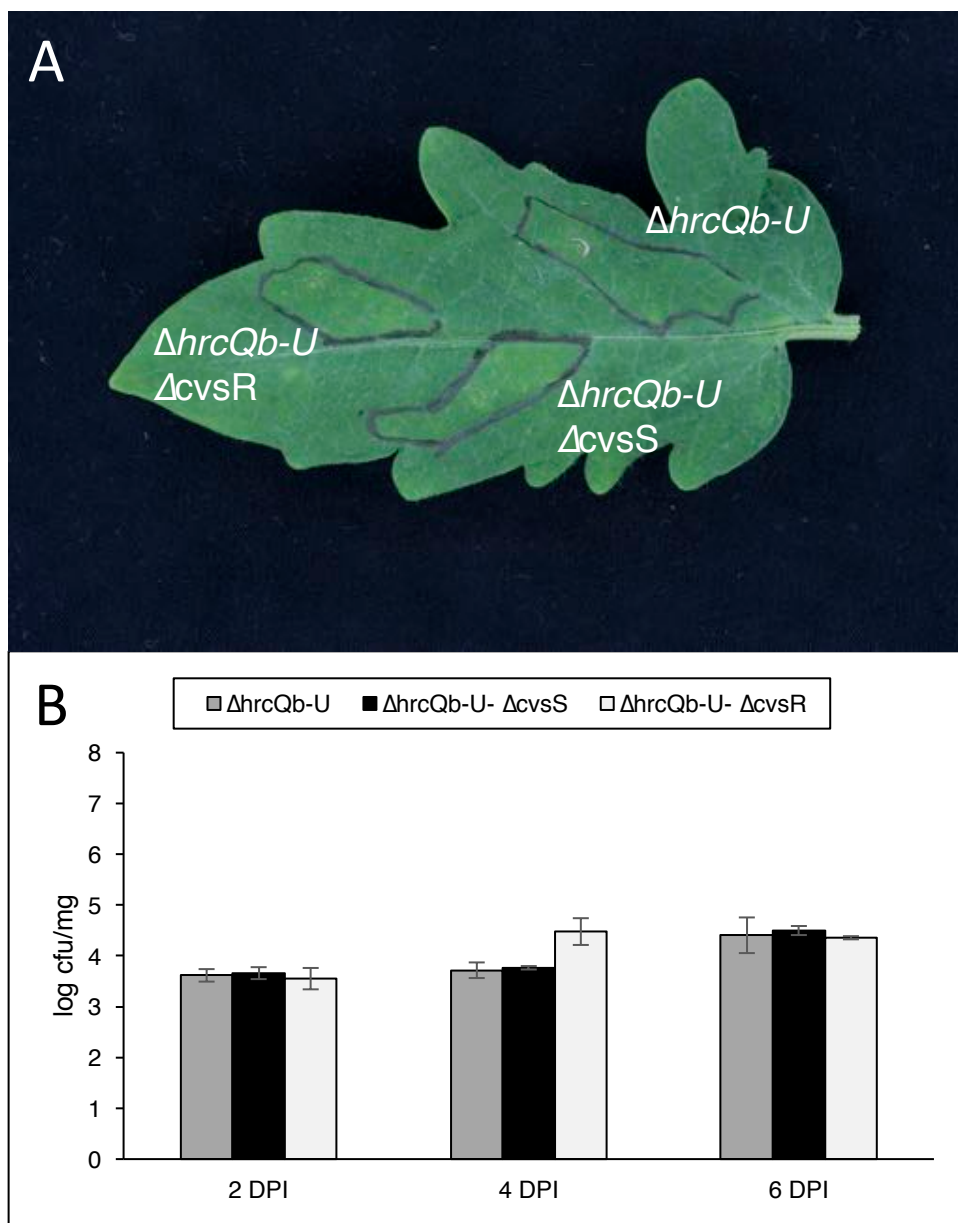

Fig. S15: (A) Picture of syringe infiltrated leaf of tomato at 6 DPI. Areas infected with  $\Delta hrcQb-U$ ,  $\Delta hrcQb-U \Delta cvrS$ , and  $\Delta hrcQb-U \Delta cvrS$  are labeled as such (B) Growth curves over time in log cfu/mg are shown for  $\Delta hrcQb-U$ ,  $\Delta hrcQb-U \Delta cvrS$ , and  $\Delta hrcQb-U \Delta cvrS$  infecting tomato at 4 DPI and 6 DPI. The strains were inoculated at  $1 \times 10^6$  cfu/mL using a blunt syringe. Average bacterial growth in three plants was used with the error bars representing the standard error between the three replicates.
